# Supplementary material for: Impact of tunable 2-(1H-indol-3-yl)acetonitrile based fluorophores towards optical, thermal and electroluminescence properties
Source: Royal Society of Chemistry journal article supplement (doi:10.1039/c8ra10448d), 2019-01-01
Supplement: c8ra10448d1.pdf [file c8ra10448d1.pdf]

## Supplementary Information (SI)

### **Impact of tunable 2-(1*H*-indol-3-yl)acetonitrile based fluorophores towards optical, thermal and electroluminescence properties**

Subramanian Muruganatham,<sup>1</sup> Gunasekaran Velmurugan,<sup>1§</sup> Justin Jesuraj,<sup>2</sup> Hassan Hafeez,<sup>2</sup>  
Seung Yoon Ryu,<sup>2\*</sup> Ponnambalam Venuvanalingam<sup>1\*</sup> and Rajalingam Renganathan<sup>1\*</sup>

<sup>1</sup>School of Chemistry, Bharathidasan University, Tiruchirappalli-620 024, Tamil Nadu, India.  
E-mail: rrengas@gmail.com, venuvanalingam@yahoo.com; Fax: +91-431-2407045; Tel:  
+91-431-2407053.

<sup>2</sup>School of Display and Semiconductor Physics, Display Convergence, College of Science  
and Technology, Korea University, Sejong Campus 2511 Sejong-ro, Sejong City, 30019,  
Republic of Korea. E-mail: Justie74@korea.ac.kr

<sup>§</sup>Present address: Institute of Inorganic Chemistry, Heidelberg University, Im Neuenheimer  
Feld 275, 69120 Heidelberg, Germany.

\*Author for correspondence

E-Mail: rrengas@gmail.com, Ph: +91-431-2407053, Fax: +91-431-2407045

| Contents          |                                                                                                                                                                                                                                                                                                                                   |             |
|-------------------|-----------------------------------------------------------------------------------------------------------------------------------------------------------------------------------------------------------------------------------------------------------------------------------------------------------------------------------|-------------|
| Figure Number     | Title                                                                                                                                                                                                                                                                                                                             | Page Number |
| <b>Chart 1</b>    | $^1\text{H}$ and $^{13}\text{C}$ NMR spectra for BIPIAN                                                                                                                                                                                                                                                                           | 3           |
| <b>Chart 2</b>    | HRMS spectrum of BIPIAN                                                                                                                                                                                                                                                                                                           | 4           |
| <b>Chart 3</b>    | $^1\text{H}$ and $^{13}\text{C}$ NMR spectra for BITIAN                                                                                                                                                                                                                                                                           | 5           |
| <b>Chart 4</b>    | HRMS spectrum of BITIAN                                                                                                                                                                                                                                                                                                           | 6           |
| <b>Figure S1</b>  | Absorption spectra of BIPIAN in different solvents                                                                                                                                                                                                                                                                                | 7           |
| <b>Figure S2</b>  | Emission spectra of BIPIAN in different solvents                                                                                                                                                                                                                                                                                  | 7           |
| <b>Figure S3</b>  | Absorption spectra of BITIAN in different solvents                                                                                                                                                                                                                                                                                | 8           |
| <b>Figure S4</b>  | Emission spectra of BITIAN in a different solvents                                                                                                                                                                                                                                                                                | 8           |
| <b>Figure S5</b>  | Lippert-Mataga plot for BIPIAN                                                                                                                                                                                                                                                                                                    | 9           |
| <b>Figure S6</b>  | Lippert-Mataga plot for BITIAN                                                                                                                                                                                                                                                                                                    | 9           |
| <b>Figure S7</b>  | Representation of $E_{\text{T}}(30)$ versus Stokes shifts for the compounds BIPIAN and BITIAN                                                                                                                                                                                                                                     | 10          |
| <b>Figure S8</b>  | Fluorescence decay curves of BIPIAN in various solvents                                                                                                                                                                                                                                                                           | 10          |
| <b>Figure S9</b>  | Illustration of $\pi$ -delocalization from calculated C-C, C-S and C-N bond lengths at B3LYP/6-31G+(d,p) level                                                                                                                                                                                                                    | 11          |
| <b>Figure S10</b> | The optimized ground state geometries and important bond lengths of BIPIAN and BITIAN obtained using B3LYP/6-31G+(d,p) level                                                                                                                                                                                                      | 12          |
| <b>Figure S11</b> | Cyclic voltammogram of BIPIAN                                                                                                                                                                                                                                                                                                     | 13          |
| <b>Figure S12</b> | Differential scanning calorimetry of BIPIAN and BITIAN                                                                                                                                                                                                                                                                            | 14          |
| <b>Figure S13</b> | (a) Current density ( $J$ ) -luminance ( $L$ ), (b) Power efficiency ( $\eta_{\text{p}}$ )-luminance and (c) External Quantum efficiency -luminescence characteristics of p-i-n fluorescent OLED with BITIAN as emitting material. (d) Fluorescence image of THF solution of BIPIAN and BITIAN under 365 nm UV light illumination | 15-16       |
| <b>Table</b>      |                                                                                                                                                                                                                                                                                                                                   |             |
| <b>Table S1</b>   | Lifetime measurements for BIPIAN and BITIN compounds                                                                                                                                                                                                                                                                              | 17          |
| <b>Table S2</b>   | Computed absorption spectra in both gas and solvent phase of BIPIAN and BITIAN along with experimental data                                                                                                                                                                                                                       | 18          |
| <b>Table S3</b>   | Ionization potential (IP), Electron affinity (EA) and Reorganization energy ( $\lambda$ ) of BIPIAN and BITIAN                                                                                                                                                                                                                    | 19          |

Chart 1:  $^1\text{H}$  and  $^{13}\text{C}$  NMR spectra of BIPIAN

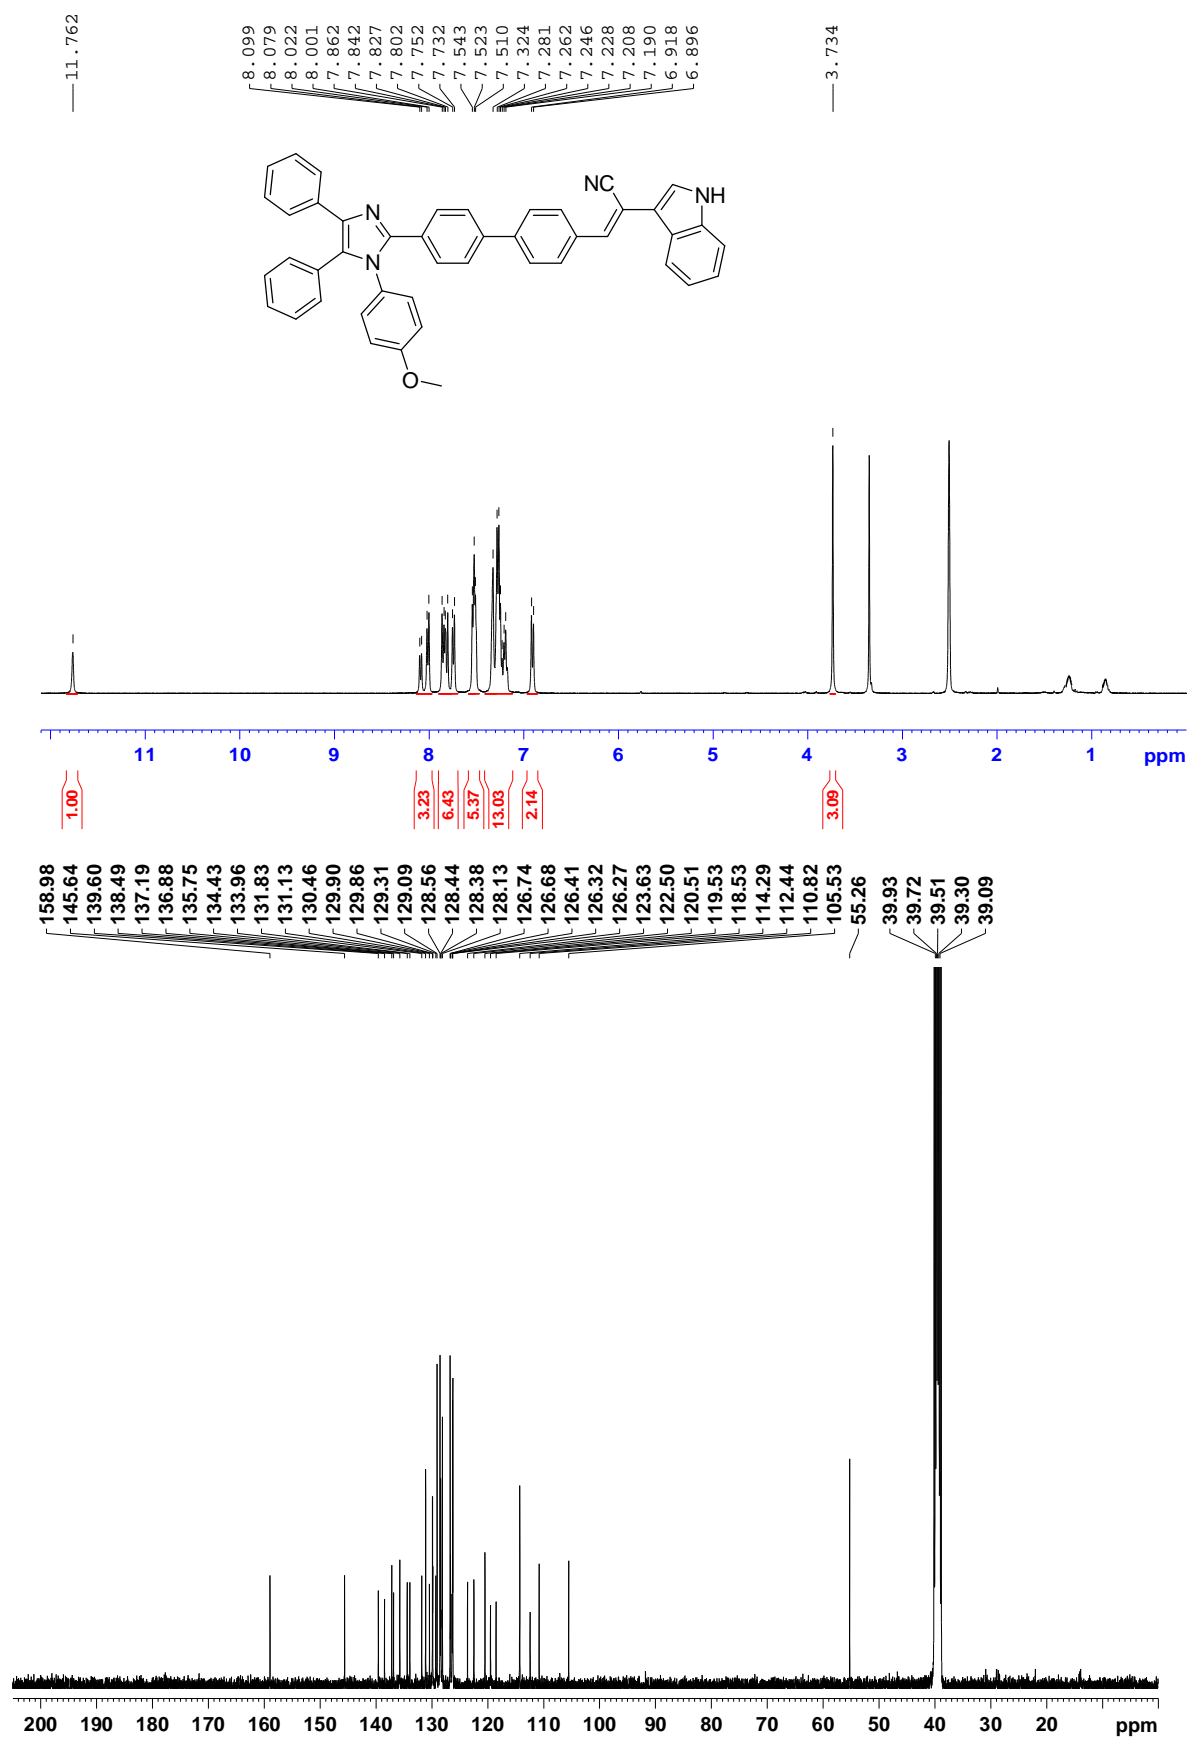

**Chart 2:** HRMS spectrum of BIPIAN

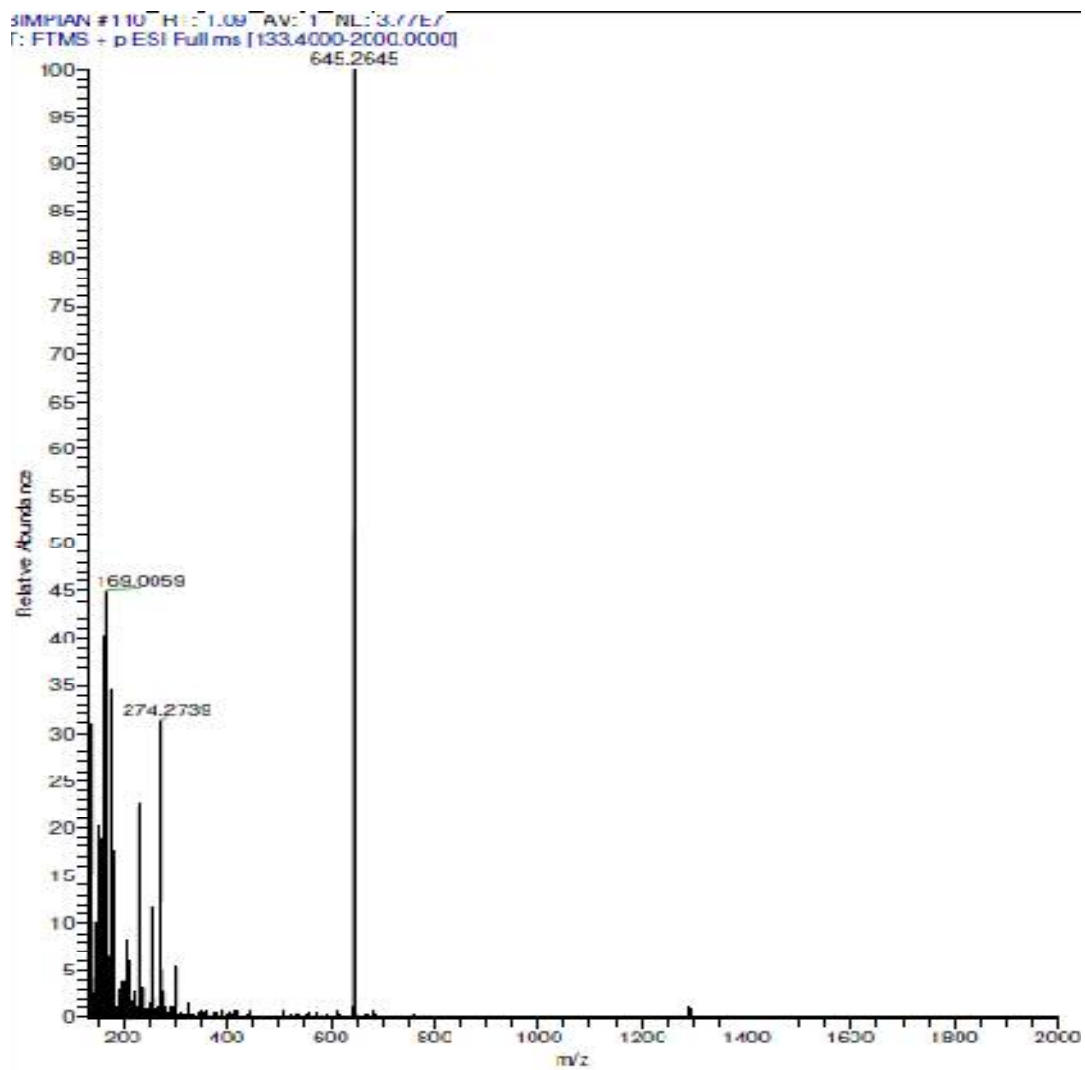

Chart 3:  $^1\text{H}$  and  $^{13}\text{C}$  NMR spectra of BITIAN

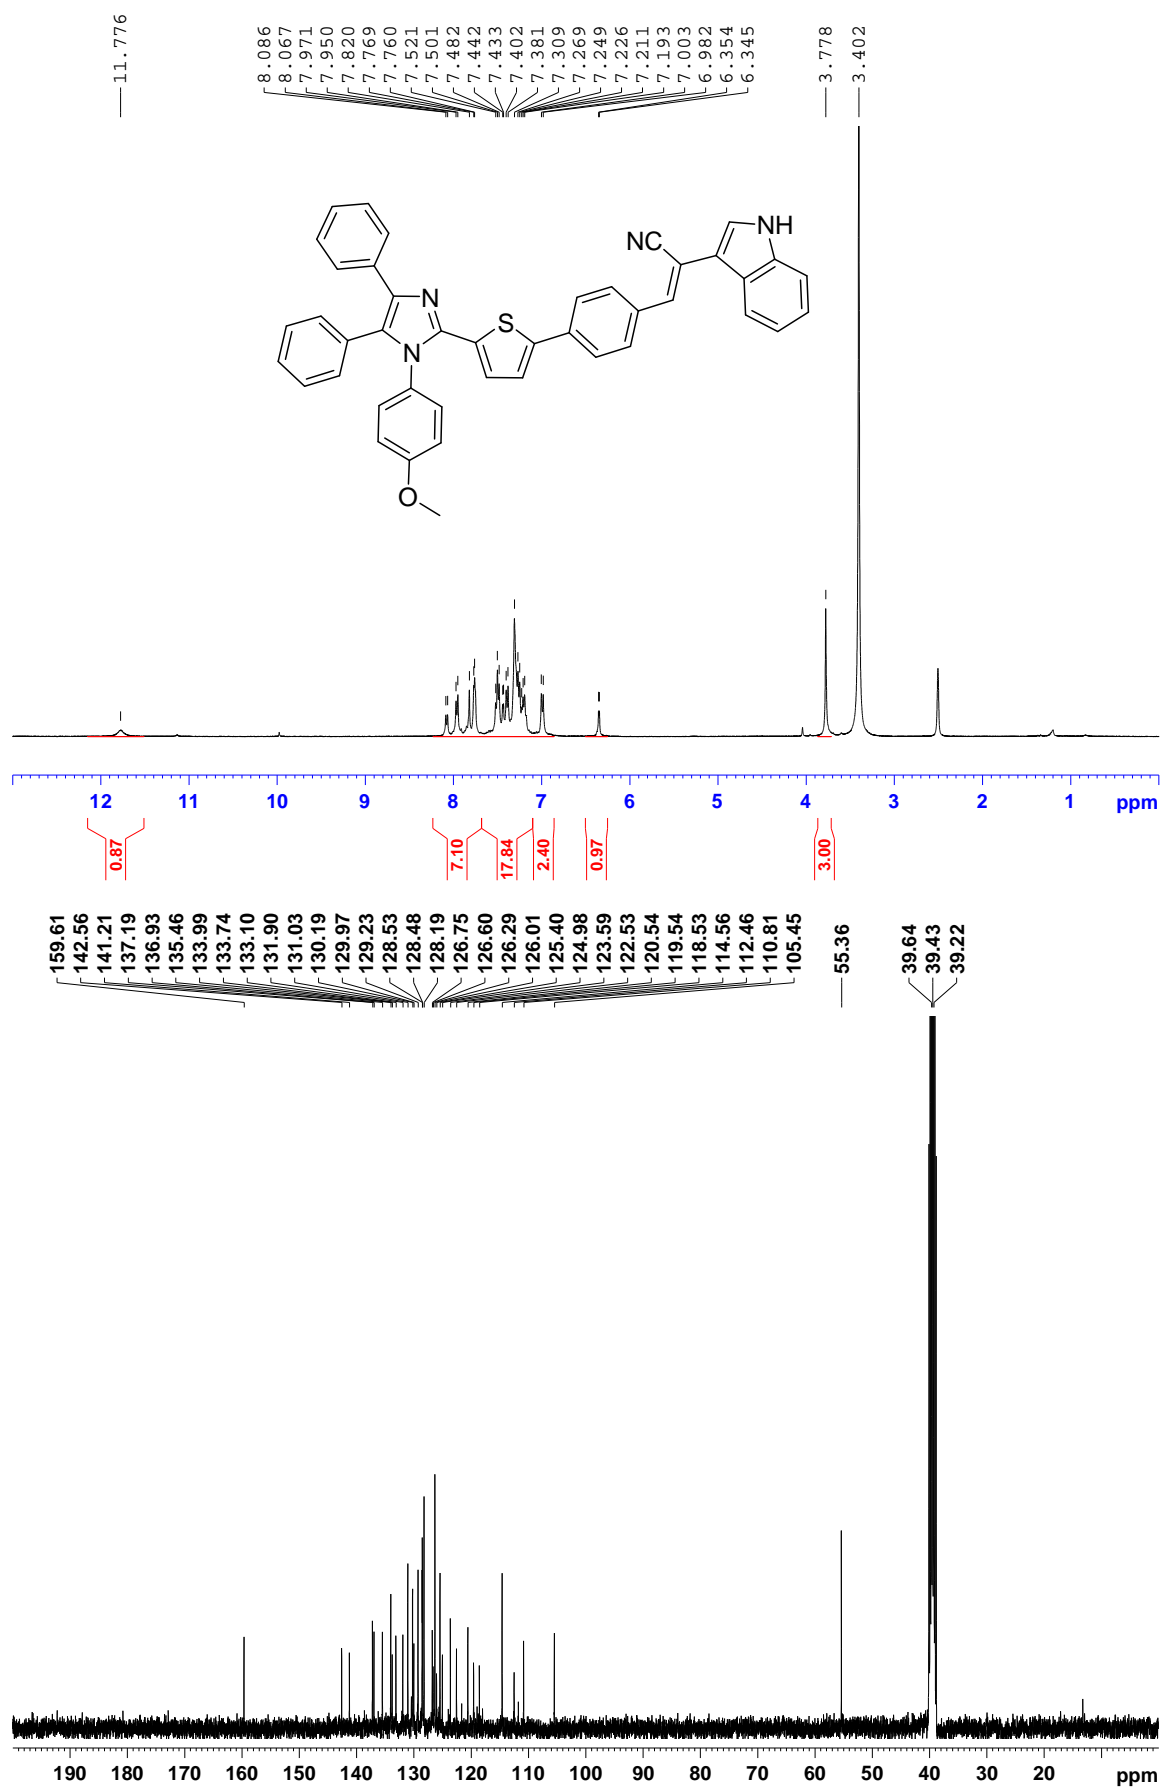

### Chart 4: HRMS spectrum of BITIAN

BMSIAN\_20180629104611 #88 RT: 0.88 AV: 1 NL: 2.14E7  
T: FTMS + p ESI Full ms [133.4000-2000.0000]

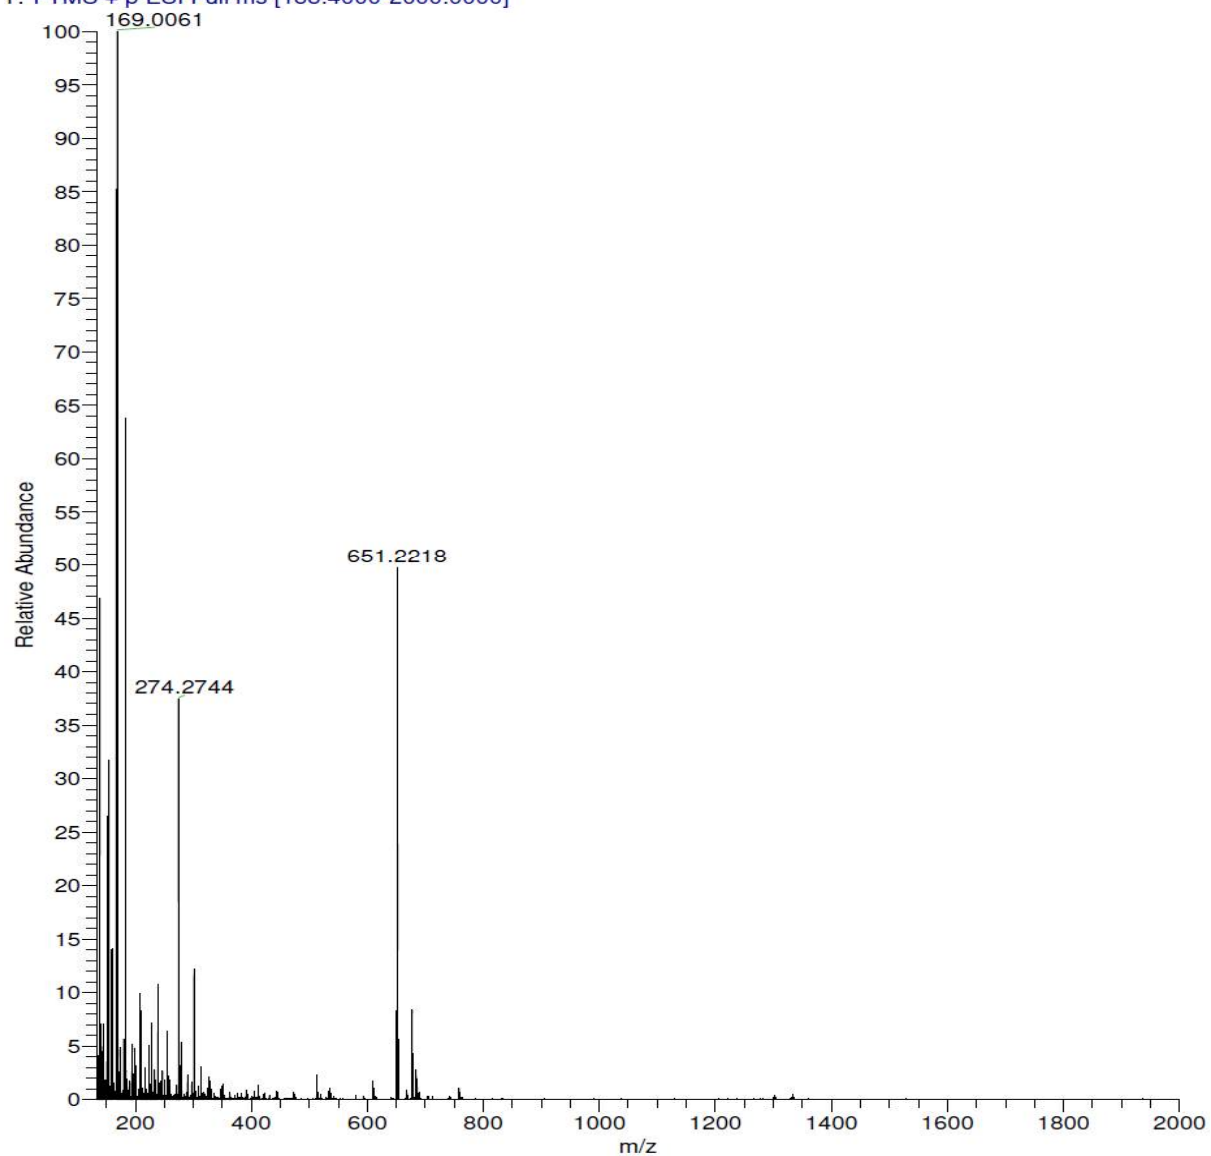

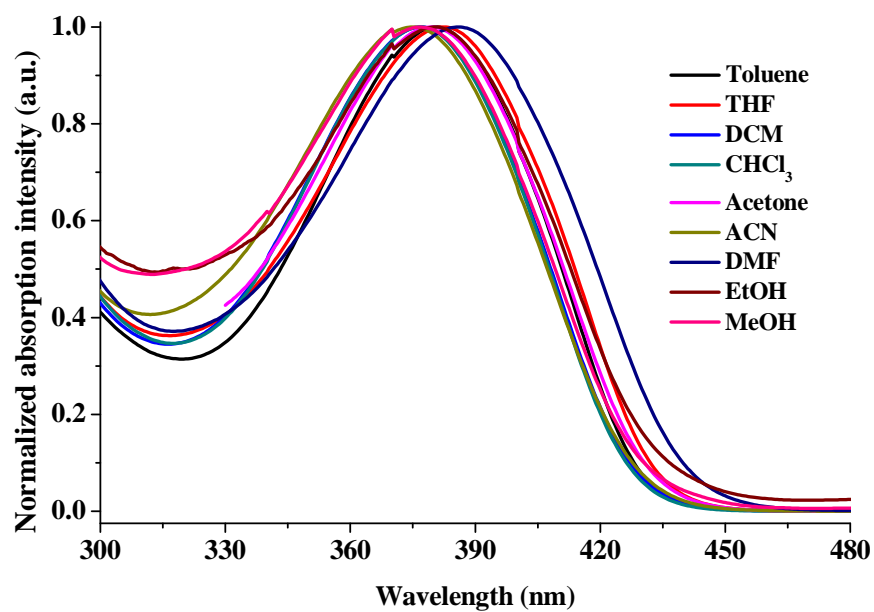

Figure S1. Absorption spectra of BIPIAN in different solvents

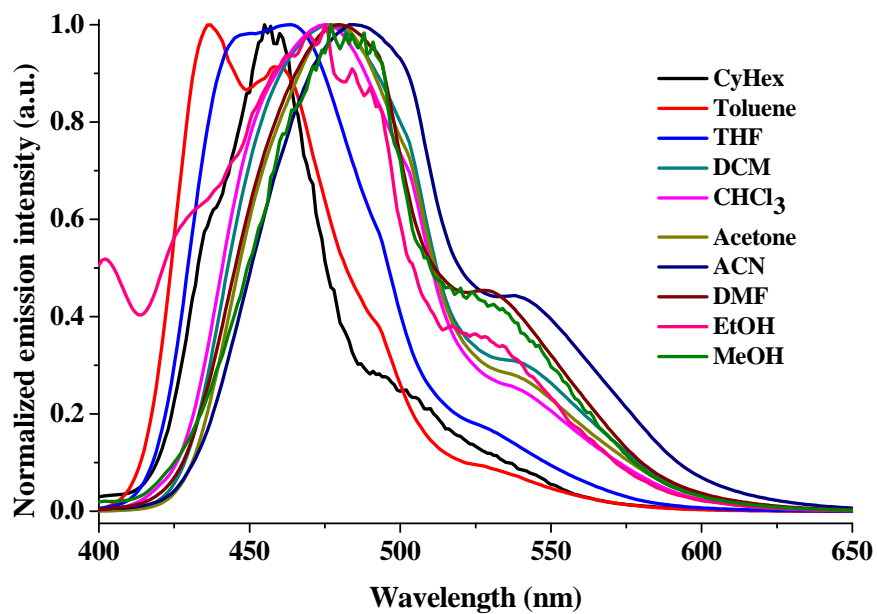

Figure S2. Emission spectra of BIPIAN in different solvents

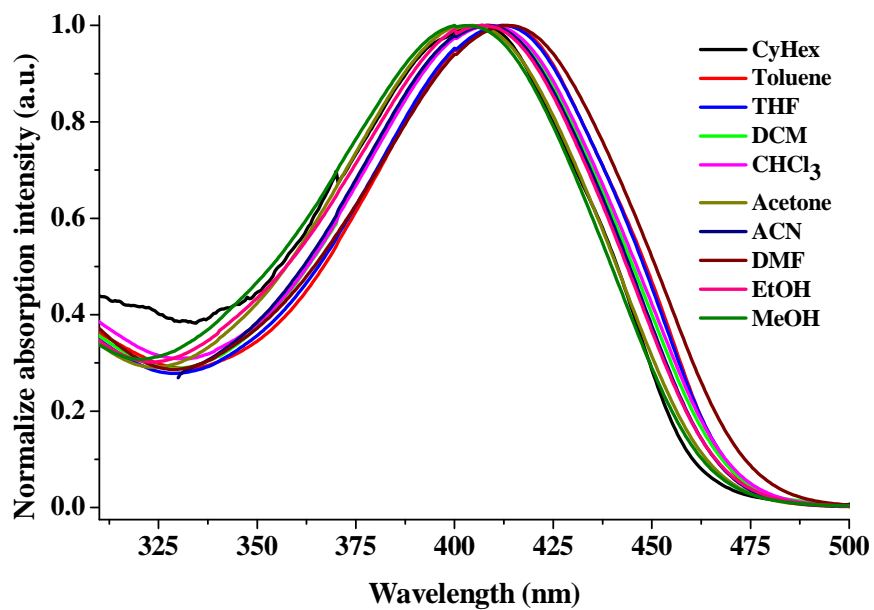

Figure S3. Absorption spectra of BITIAN in different solvents

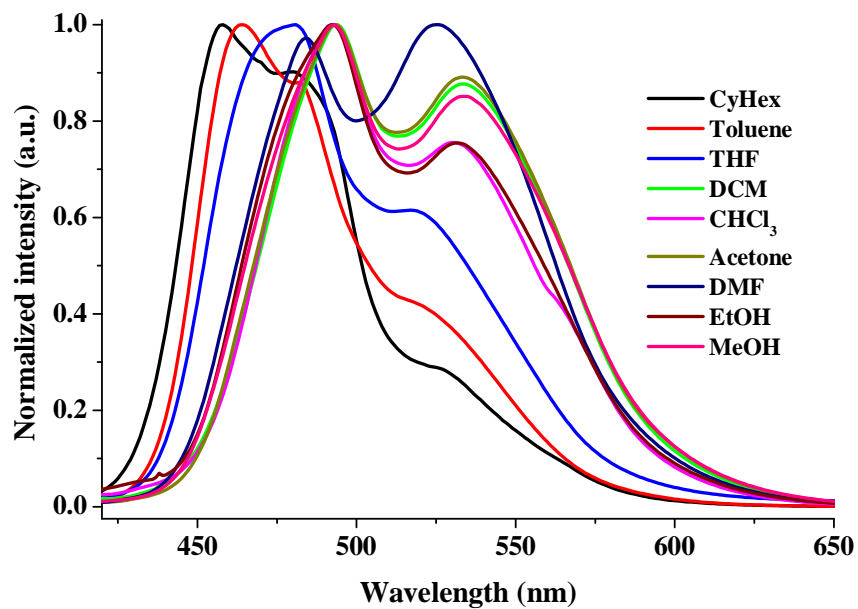

Figure S4. Emission spectra of BITIAN in different solvents



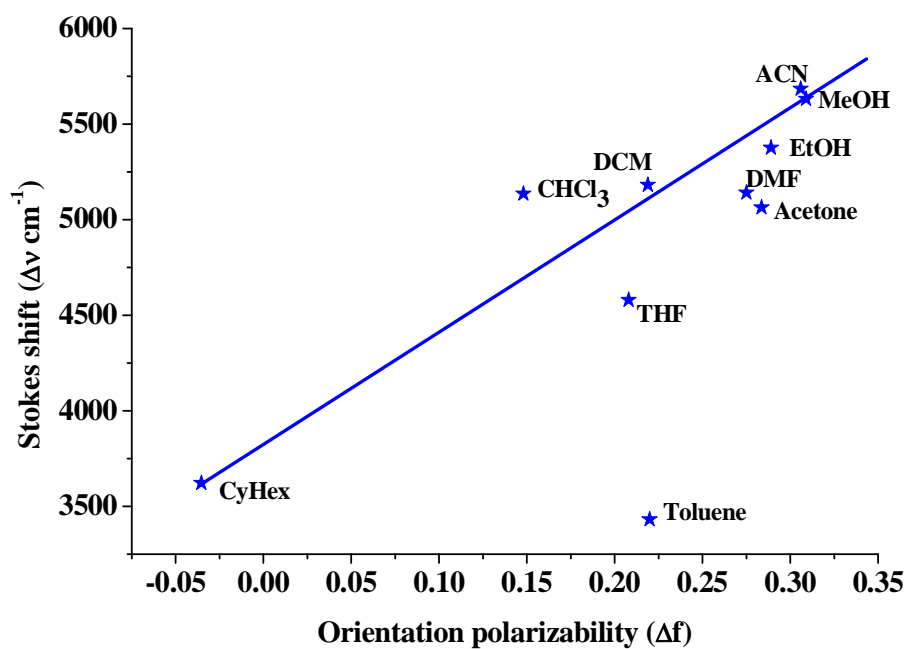

Figure S5. Lippert-mataga plot for BIPIAN

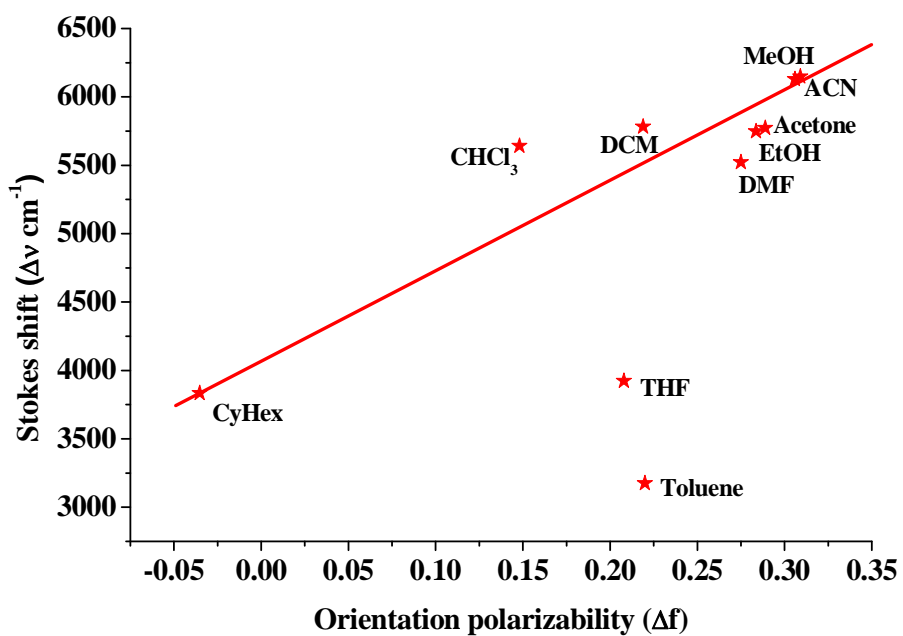

Figure S6. Lippert-mataga plot for BITIAN

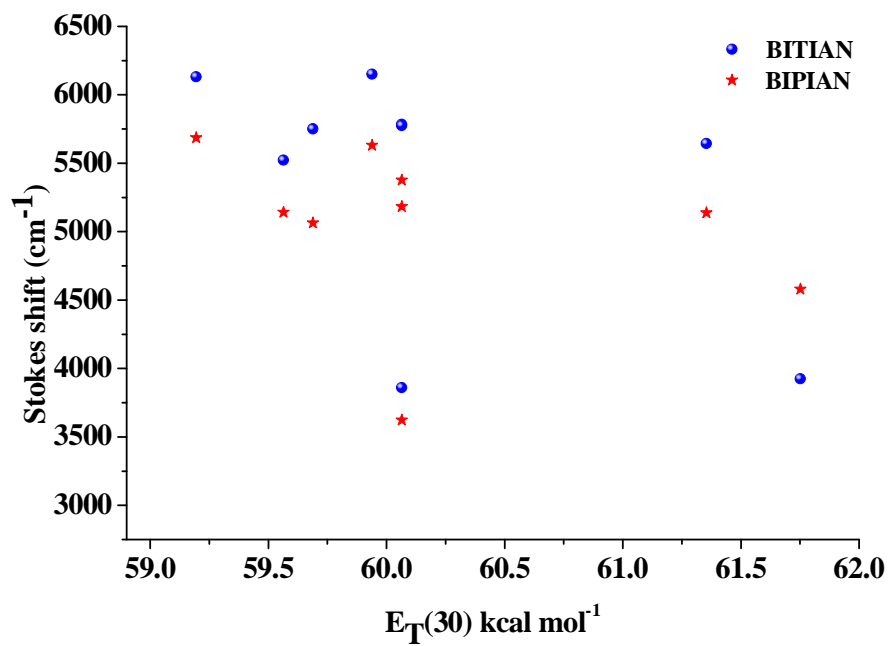

**Figure S7.** Representation of  $E_T(30)$  versus Stokes shift for BIPIAN and BITIAN

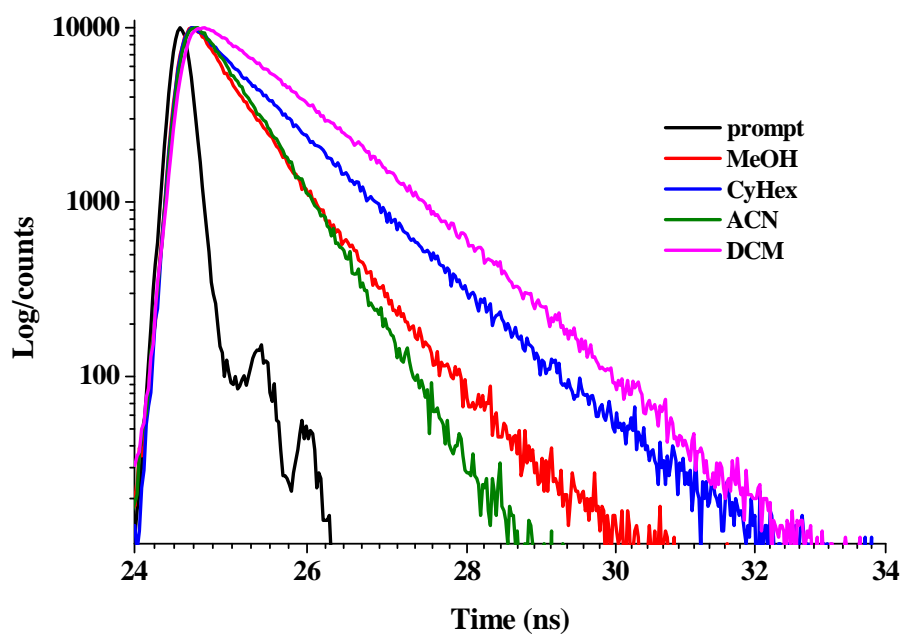

**Figure S8.** Fluorescence decay curves of BIPIAN in various solvents

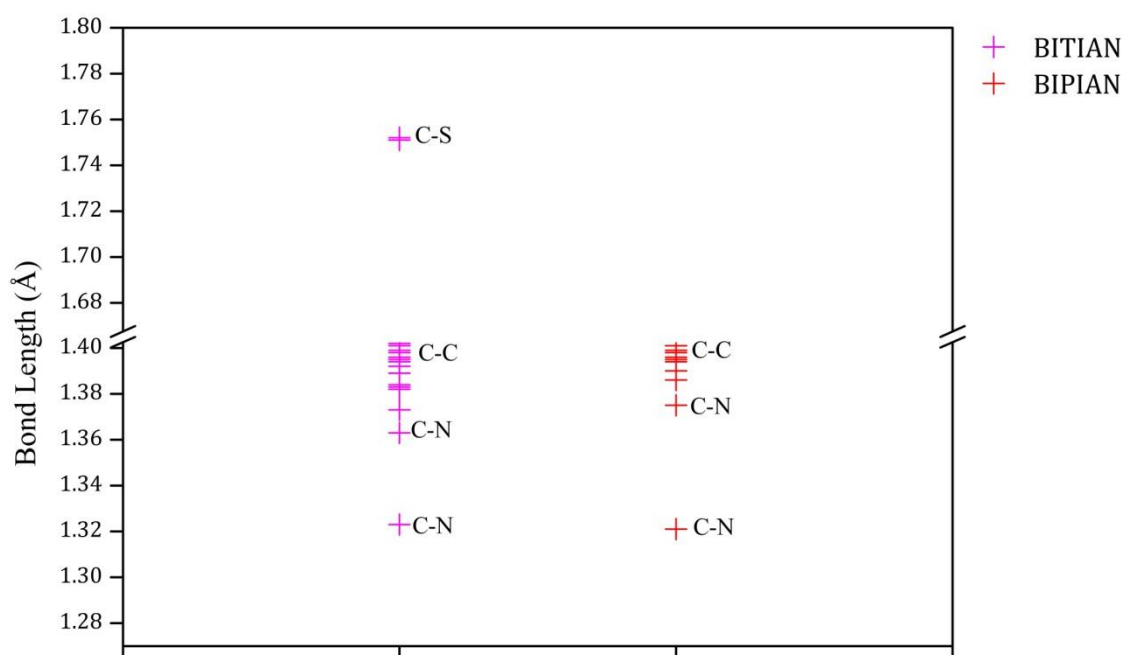

**Figure S9.** Illustration of  $\pi$ -delocalization from calculated C-C, C-S and C-N bond lengths at B3LYP/6-31G+(d,p) level



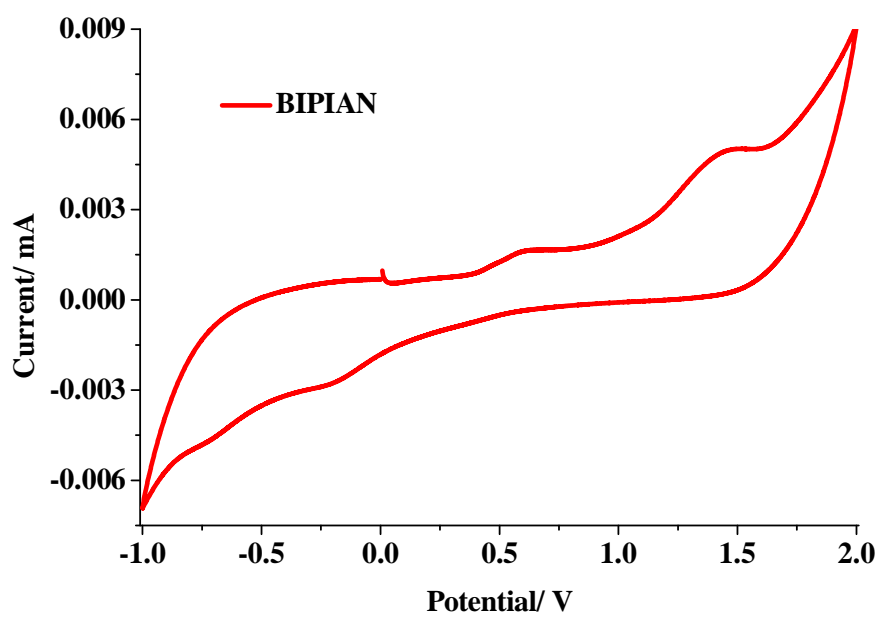

Figure S11. Cyclic voltammogram of BIPIAN

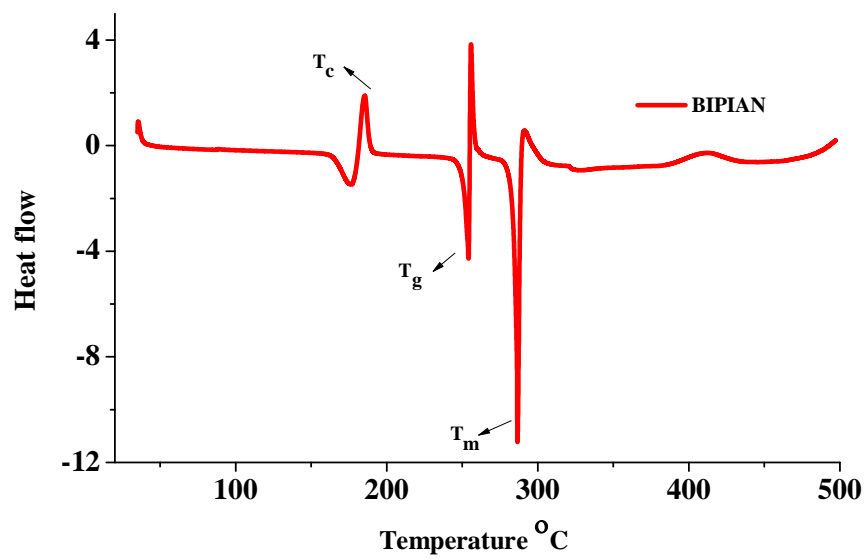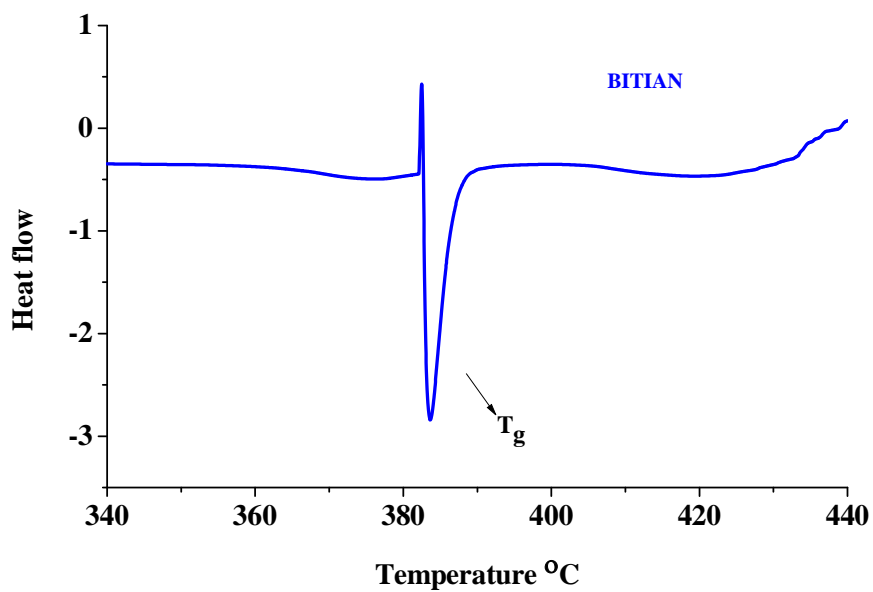

**Figure S12.** Differential scanning calorimetry of BIPIAN and BITIAN

(a)

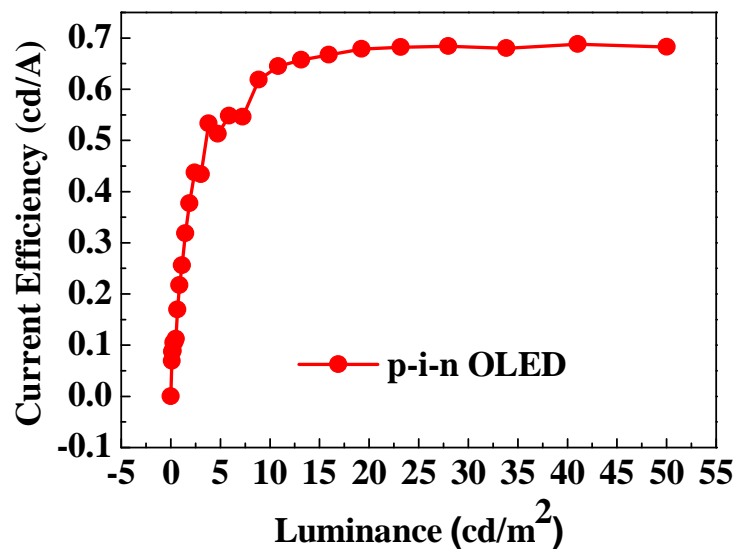

(b)

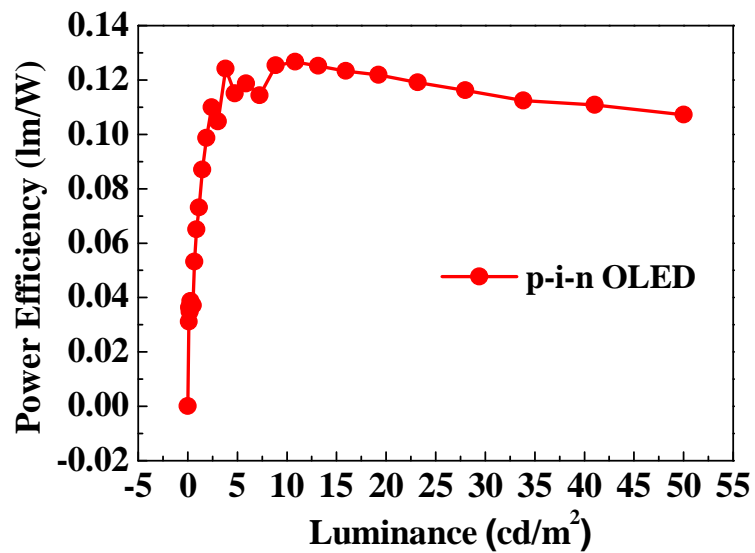

(c)

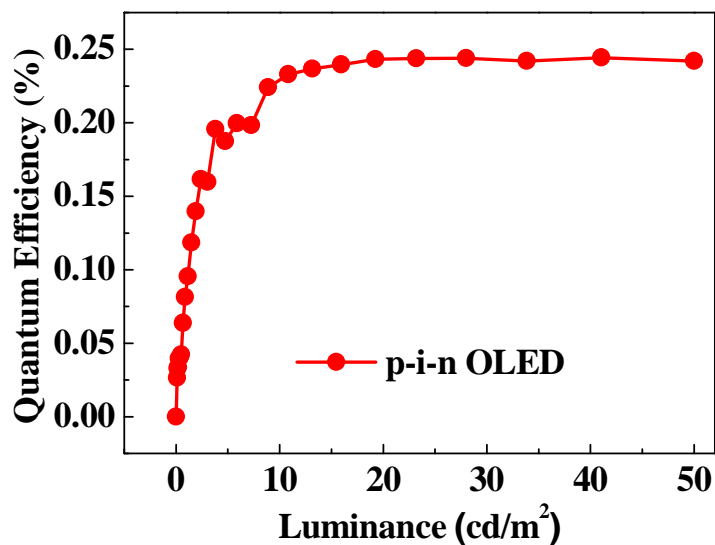

(d)

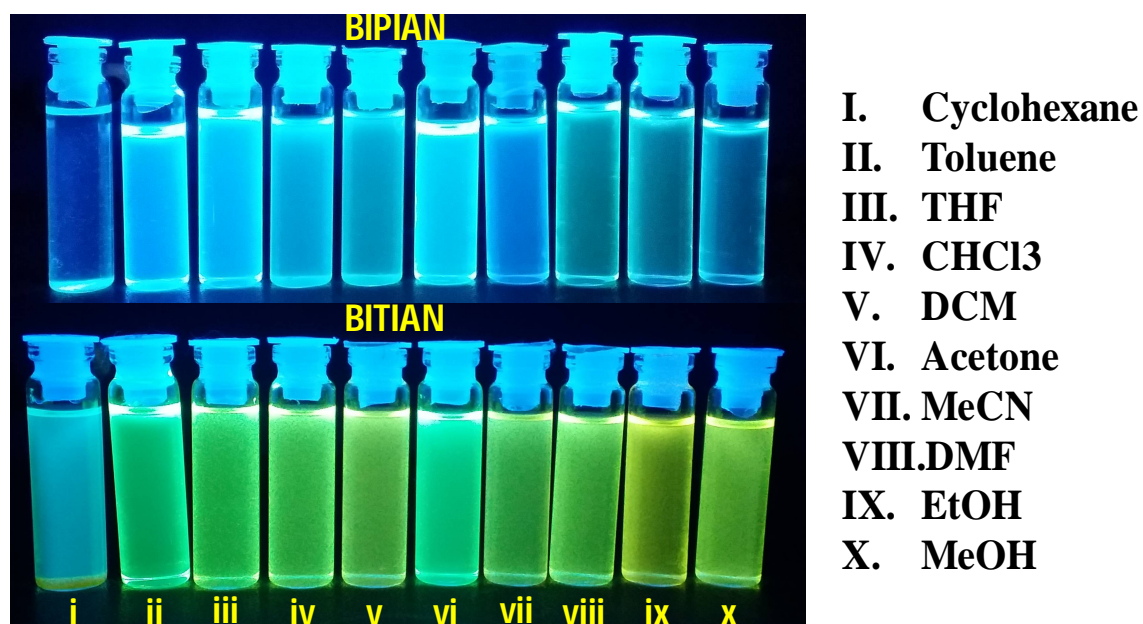

**Figure S13.** (a) Current density ( $J$ )-luminance ( $L$ ), (b) Power efficiency ( $\eta_p$ )-luminance and (c) External Quantum efficiency -luminescence characteristics of p-i-n fluorescent OLED with BITIAN as emitting material and (d) Fluorescence image of BIPIAN and BITIAN in various solvent with varying polarity under 365 nm UV light illumination



**Table S1.** Lifetime measurements for BIPIAN and BITIAN compounds

| Solvents | BIPIAN                        |                   |                  |                   |                                         |          |                                         |                                            | BITIAN           |                   |                  |                   |                            |          |                            |                               |
|----------|-------------------------------|-------------------|------------------|-------------------|-----------------------------------------|----------|-----------------------------------------|--------------------------------------------|------------------|-------------------|------------------|-------------------|----------------------------|----------|----------------------------|-------------------------------|
|          | <sup>a</sup> $\tau_1$<br>[ns] | $\alpha_1$<br>[%] | $\tau_2$<br>[ns] | $\alpha_2$<br>[%] | <sup>b</sup> $\langle\tau\rangle$<br>ns | $\chi^2$ | <sup>c</sup> $K_r$<br>( $10^7 s^{-1}$ ) | <sup>d</sup> $K_{nr}$<br>( $10^7 s^{-1}$ ) | $\tau_1$<br>[ns] | $\alpha_1$<br>[%] | $\tau_2$<br>[ns] | $\alpha_2$<br>[%] | $\langle\tau\rangle$<br>ns | $\chi^2$ | $K_r$<br>( $10^7 s^{-1}$ ) | $K_{nr}$<br>( $10^7 s^{-1}$ ) |
| CyHex    | 0.50                          | 25.83             | 1.03             | 74.17             | 0.955                                   | 1.1      | 0.52                                    | 0.52                                       | 0.61             | 16.06             | 1.07             | 83.94             | 1.033                      | 1.25     | 0.62                       | 0.34                          |
| DCM      | 1.08                          | -----             | -----            | -----             | -----                                   | 1.01     | ----                                    | ----                                       | 0.59             | 20.45             | 1.28             | 79.55             | 1.20                       | 1.18     | 0.55                       | 0.27                          |
| ACN      | 0.28                          | 14.22             | 0.50             | 85.78             | 0.481                                   | 1.25     | 0.63                                    | 1.44                                       | 0.38             | 11.68             | 1.38             | 88.32             | 1.34                       | 1.25     | 0.17                       | 0.57                          |
| MeOH     | 42.84                         | 0.42              | 0.76             | 57.16             | 0.660                                   | 2.62     | 0.87                                    | 0.63                                       | 0.58             | 2.01              | 1.19             | 97.99             | 1.18                       | 1.52     | 0.36                       | 0.48                          |

<sup>a</sup>Lifetime ( $\tau$ ), <sup>b</sup> average lifetime ( $\langle\tau\rangle$ ), <sup>c</sup> radiative ( $k_r$ ) and <sup>d</sup> non-radiative ( $k_{nr}$ ) rate constants of BIPIAN and BITIAN in various solvents.

**Table S2.** Computed absorption spectra in both gas and solvent phase of BIPIAN and BITIAN along with experimental data

|               | States                  | Electron Transition   | Cal. $\lambda_{\max}$ (nm) | Exp. $\lambda_{\max}$ (nm) | Oscillator Strength (f) | E (eV) | Main Contributing Configurations                                 |
|---------------|-------------------------|-----------------------|----------------------------|----------------------------|-------------------------|--------|------------------------------------------------------------------|
| <b>BIPIAN</b> | <b>Gas-phase</b>        | $S_0 \rightarrow S_1$ | 357.2                      | -                          | 1.722                   | 3.47   | HOMO $\rightarrow$ LUMO (61%)<br>HOMO-1 $\rightarrow$ LUMO (30%) |
|               | <b>CYHEX</b>            | $S_0 \rightarrow S_1$ | 369.7                      | 406                        | 1.748                   | 3.35   | HOMO $\rightarrow$ LUMO (67%)<br>HOMO-1 $\rightarrow$ LUMO (24%) |
|               | <b>TOLEUNE</b>          | $S_0 \rightarrow S_1$ | 371.3                      | 380                        | 1.742                   | 3.34   | HOMO $\rightarrow$ LUMO (69%)<br>HOMO-1 $\rightarrow$ LUMO (23%) |
|               | <b>THF</b>              | $S_0 \rightarrow S_1$ | 372.7                      | 382                        | 1.679                   | 3.33   | HOMO $\rightarrow$ LUMO (77%)<br>HOMO-1 $\rightarrow$ LUMO (15%) |
|               | <b>DCM</b>              | $S_0 \rightarrow S_1$ | 373.2                      | 376                        | 1.676                   | 3.32   | HOMO $\rightarrow$ LUMO (77%)<br>HOMO-1 $\rightarrow$ LUMO (14%) |
|               | <b>CHCl<sub>3</sub></b> | $S_0 \rightarrow S_1$ | 372.5                      | 376                        | 1.699                   | 3.33   | HOMO $\rightarrow$ LUMO (74%)<br>HOMO-1 $\rightarrow$ LUMO (17%) |
|               | <b>ACN</b>              | $S_0 \rightarrow S_1$ | 372.9                      | 374                        | 1.647                   | 3.32   | HOMO $\rightarrow$ LUMO (80%)<br>HOMO-1 $\rightarrow$ LUMO (11%) |
|               | <b>ACETONE</b>          | $S_0 \rightarrow S_1$ | 372.9                      | 379                        | 1.654                   | 3.32   | HOMO $\rightarrow$ LUMO (79%)<br>HOMO-1 $\rightarrow$ LUMO (12%) |
|               | <b>DMF</b>              | $S_0 \rightarrow S_1$ | 374.4                      | 385                        | 1.656                   | 3.31   | HOMO $\rightarrow$ LUMO (80%)<br>HOMO-1 $\rightarrow$ LUMO (11%) |
|               | <b>MeOH</b>             | $S_0 \rightarrow S_1$ | 372.6                      | 376                        | 1.646                   | 3.33   | HOMO $\rightarrow$ LUMO (80%)<br>HOMO-1 $\rightarrow$ LUMO (11%) |
|               | <b>EtOH</b>             | $S_0 \rightarrow S_1$ | 373.1                      | 379                        | 1.653                   | 3.32   | HOMO $\rightarrow$ LUMO (80%)<br>HOMO-1 $\rightarrow$ LUMO (12%) |
| <b>BITIAN</b> | <b>Gas-phase</b>        | $S_0 \rightarrow S_1$ | 392.6                      | -                          | 1.829                   | 3.16   | HOMO $\rightarrow$ LUMO (81%)<br>HOMO-1 $\rightarrow$ LUMO (7%)  |
|               | <b>CYHEX</b>            | $S_0 \rightarrow S_1$ | 405.2                      | 405                        | 1.941                   | 3.06   | HOMO $\rightarrow$ LUMO (81%)<br>HOMO-1 $\rightarrow$ LUMO (7%)  |
|               | <b>TOLEUNE</b>          | $S_0 \rightarrow S_1$ | 406.7                      | 412                        | 1.948                   | 3.05   | HOMO $\rightarrow$ LUMO (81%)<br>HOMO-1 $\rightarrow$ LUMO (7%)  |
|               | <b>THF</b>              | $S_0 \rightarrow S_1$ | 407.0                      | 411                        | 1.917                   | 3.05   | HOMO $\rightarrow$ LUMO (83%)<br>HOMO-1 $\rightarrow$ LUMO (5%)  |
|               | <b>DCM</b>              | $S_0 \rightarrow S_1$ | 407.5                      | 408                        | 1.919                   | 3.04   | HOMO $\rightarrow$ LUMO (83%)<br>HOMO-1 $\rightarrow$ LUMO (5%)  |
|               | <b>CHCl<sub>3</sub></b> | $S_0 \rightarrow S_1$ | 407.2                      | 408                        | 1.929                   | 3.05   | HOMO $\rightarrow$ LUMO (83%)<br>HOMO-1 $\rightarrow$ LUMO (6%)  |
|               | <b>ACN</b>              | $S_0 \rightarrow S_1$ | 406.8                      | 404                        | 1.897                   | 3.05   | HOMO $\rightarrow$ LUMO (84%)<br>HOMO-1 $\rightarrow$ LUMO (4%)  |
|               | <b>ACETONE</b>          | $S_0 \rightarrow S_1$ | 406.9                      | 408                        | 1.902                   | 3.05   | HOMO $\rightarrow$ LUMO (84%)<br>HOMO-1 $\rightarrow$ LUMO (4%)  |
|               | <b>DMF</b>              | $S_0 \rightarrow S_1$ | 408.3                      | 413                        | 1.912                   | 3.04   | HOMO $\rightarrow$ LUMO (84%)<br>HOMO-1 $\rightarrow$ LUMO (4%)  |
|               | <b>MeOH</b>             | $S_0 \rightarrow S_1$ | 406.4                      | 402                        | 1.894                   | 3.05   | HOMO $\rightarrow$ LUMO (84%)<br>HOMO-1 $\rightarrow$ LUMO (4%)  |
|               | <b>EtOH</b>             | $S_0 \rightarrow S_1$ | 407.0                      | 407                        | 1.902                   | 3.05   | HOMO $\rightarrow$ LUMO (84%)<br>HOMO-1 $\rightarrow$ LUMO (4%)  |

**Table S3.** Ionization potential (IP), Electron affinity (EA) and Reorganization energy ( $\lambda$ ) of BIPIAN and BITIAN

| <b>Molecule</b> | <b>IP(v)</b> | <b>IP(a)</b> | <b>HEP</b> | <b>EA(v)</b> | <b>EA(a)</b> | <b>EEP</b> | $\lambda_{\text{hole}}$ | $\lambda_{\text{electron}}$ |
|-----------------|--------------|--------------|------------|--------------|--------------|------------|-------------------------|-----------------------------|
| <b>BIPIAN</b>   | 6.33         | 6.19         | 6.06       | 1.07         | 1.25         | 1.43       | 0.27                    | 0.36                        |
| <b>BITIAN</b>   | 6.15         | 6.00         | 5.86       | 1.17         | 1.34         | 1.34       | 0.28                    | 0.32                        |
